# Supplementary material for: Spatio-temporal observations of nocturnal low-level jets and impacts on wind power production
Source: Copernicus journal article supplement (doi:10.5194/wes-2022-26), 2022-04-19

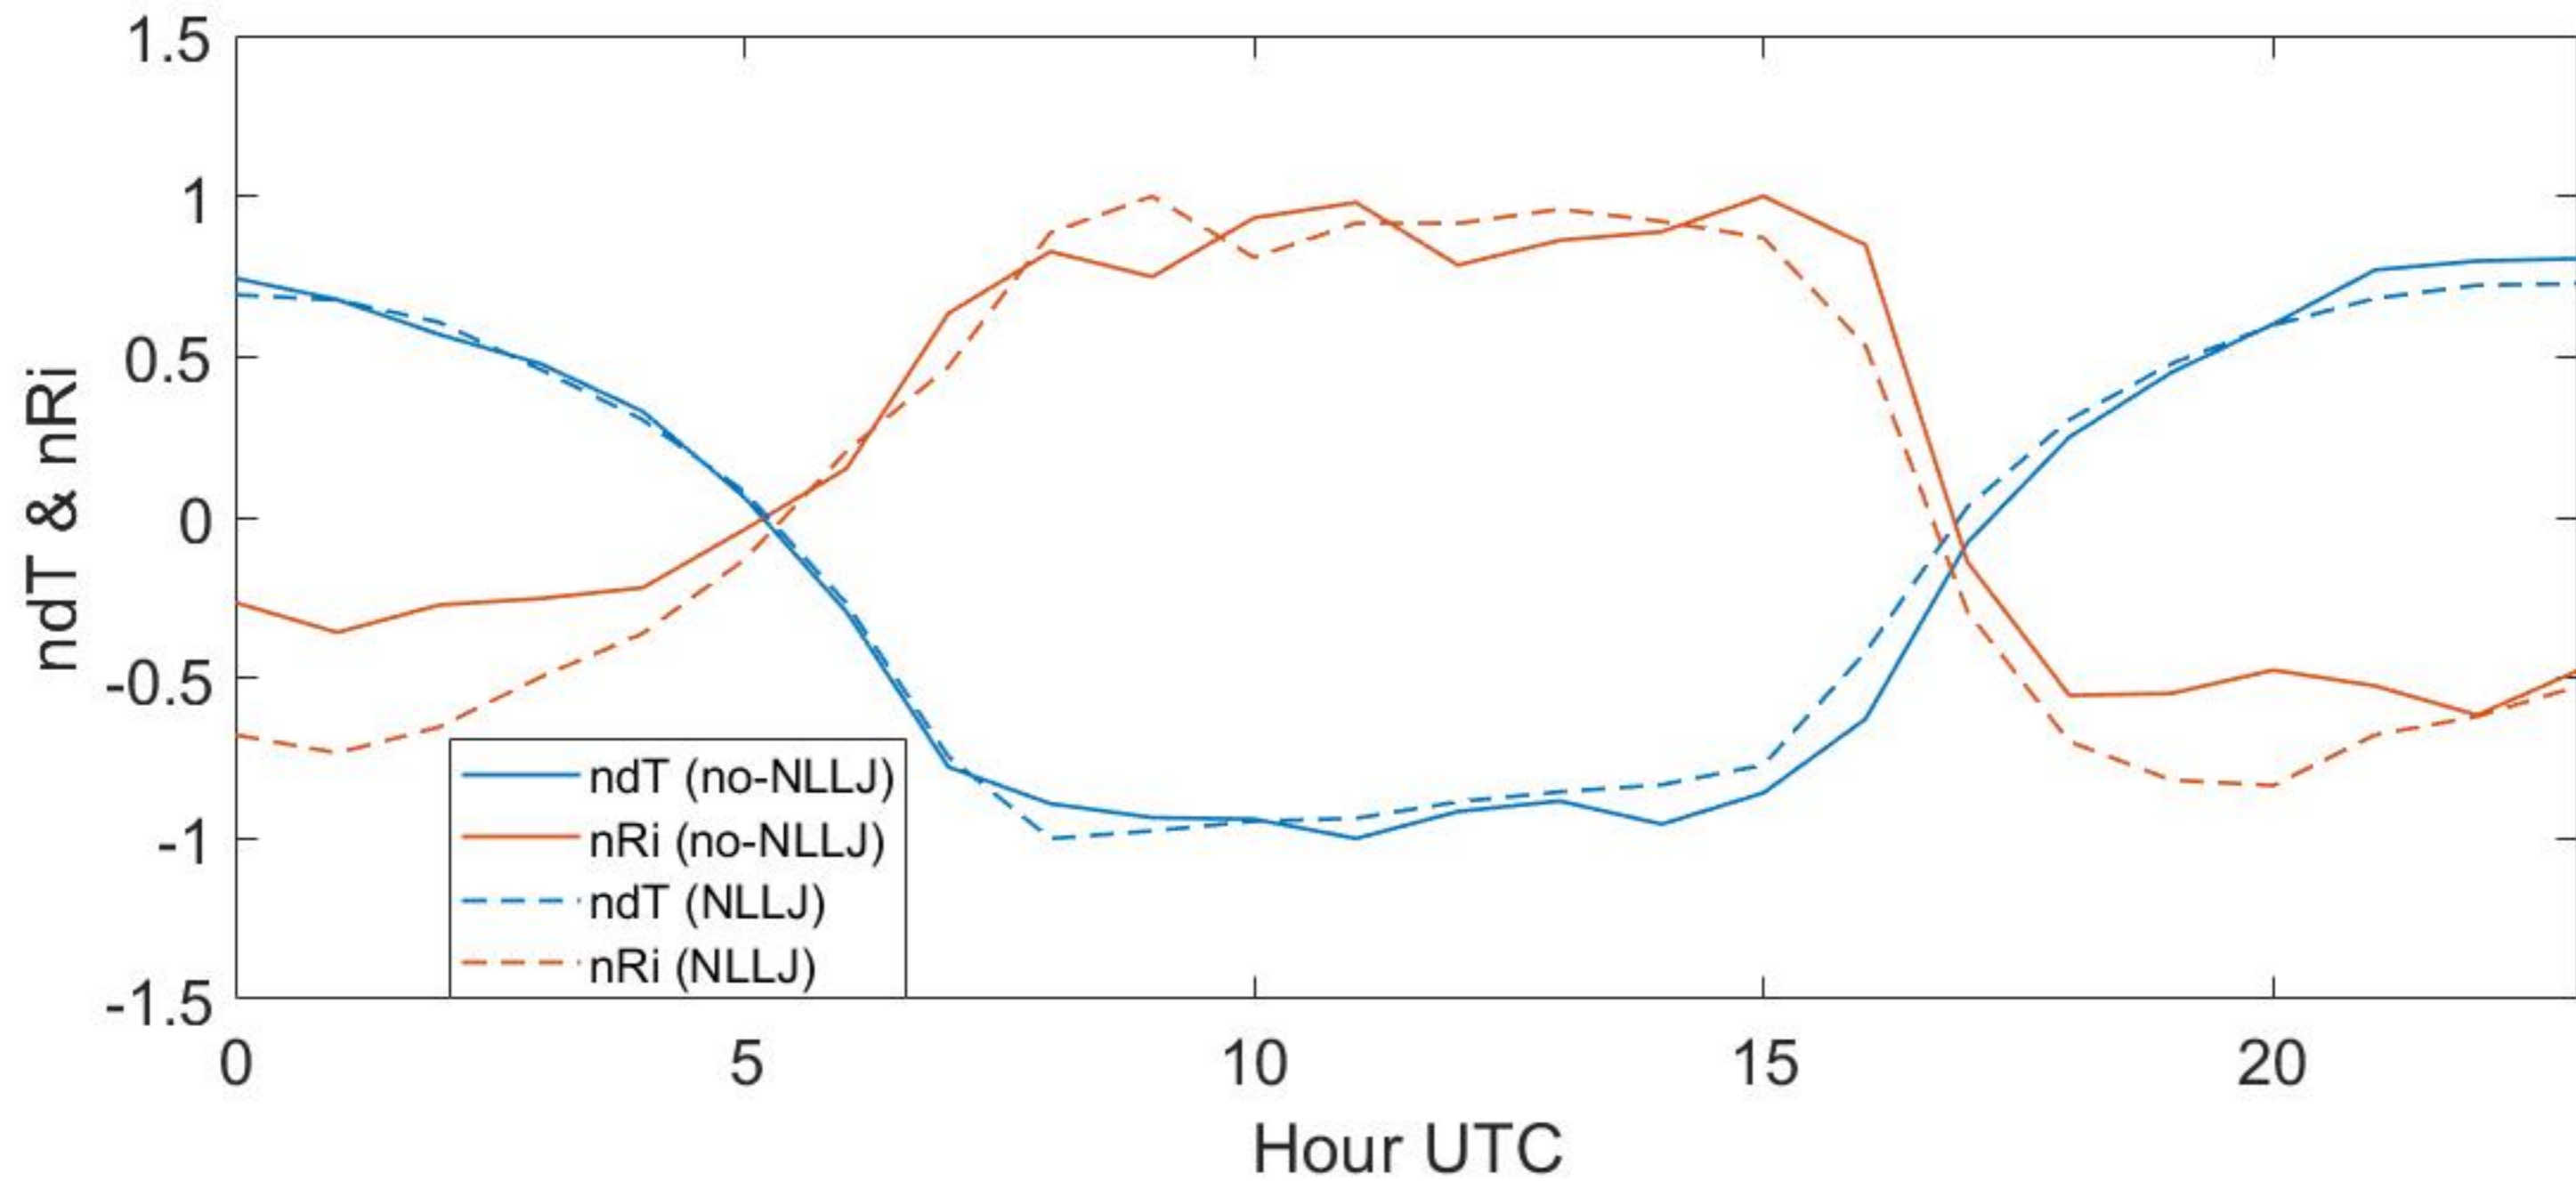

Supplement: Supplementary file [file wes-2022-26-AC2-supplement.pdf]
